# Supplementary material
Source: publisher figshare collection journal article supplement (https://acs.figshare.com/ndownloader/files/7224029)
Supplement: Supplementary file 1 [file 7224029]

#=======================================================================
data_global
#======================================================================= 
_publ_contact_author_name                'Mercouri G. Kanatzidis'
_publ_contact_author_address
;
   Department of Chemistry
     2145 Sheridan Road
   Northwestern University
   Evanston, IL 60208-3113
           USA
;
_publ_contact_author_email               m-kanatzidis@northwestern.edu
_publ_contact_author_fax                 '847-491-5937'
_publ_contact_author_phone               '847-467-1541'
#=======================================================================
data_3b.GA2SnI4-100K
#======================================================================= 
 
_audit_creation_method            SHELXL-97 
_chemical_name_systematic 
; 
 ? 
; 
_chemical_name_common             'DiGuanidinium Tin Iodide'
_chemical_melting_point           ? 
_chemical_formula_moiety          '(C(NH2)3)2SnI4' 
_chemical_formula_sum 
 'C2 H12 I4 N6 Sn' 
_chemical_formula_weight          746.47 
 
loop_ 
 _atom_type_symbol 
 _atom_type_description 
 _atom_type_scat_dispersion_real 
 _atom_type_scat_dispersion_imag 
 _atom_type_scat_source 
 'C'  'C'   0.0033   0.0016 
 'International Tables Vol C Tables 4.2.6.8 and 6.1.1.4' 
 'H'  'H'   0.0000   0.0000 
 'International Tables Vol C Tables 4.2.6.8 and 6.1.1.4' 
 'N'  'N'   0.0061   0.0033 
 'International Tables Vol C Tables 4.2.6.8 and 6.1.1.4' 
 'Sn'  'Sn'  -0.6537   1.4246 
 'International Tables Vol C Tables 4.2.6.8 and 6.1.1.4' 
 'I'  'I'  -0.4742   1.8119 
 'International Tables Vol C Tables 4.2.6.8 and 6.1.1.4' 
 
_symmetry_cell_setting           triclinic
_symmetry_space_group_name_H-M   'P-1'
_symmetry_space_group_name_Hall  '-P 1'
_symmetry_Int_Tables_number      2 
 
loop_ 
 _symmetry_equiv_pos_as_xyz 
 'x, y, z' 
 '-x, -y, -z'

_geom_special_details  
;
 'All esds (except the esd in the dihedral angle between two l.s. planes)' 
 'are estimated using the full covariance matrix. The cell esds are taken' 
 'into account individually in the estimation of esds in distances, angles' 
 'and torsion angles; correlations between esds in cell parameters are only' 
 'used when they are defined by crystal symmetry.  An approximate (isotropic)' 
 'treatment of cell esds is used for estimating esds involving l.s. planes.'
 'The crystal is a non-merohedral twin forming the persistent'
 'twin matrix [-1 0 0 0 -1 0 -0.193 -0.883 1], as proved by examination of'
 'more than 5 individual crystals. The two domains can be split into the'
 'two individual domains by integration. The refinements gives decent'
 'structure solutions (R-5%, wR-8%) but due to significant reflection overlap'
 'the data completeness drops at 66% which is not acceptable.' 
 'HKLF5 refinement is also insufficient for refinement giving an R-22%'
 'Thus, all the reflections were used and the twin was moderately resolved'
 'by twin refinement using Jana2006. The solution and the thus generated'
 'reflection files were then thansferred to SHELX-97 for the final refinement.'
 'The H-atom position was also calculated with Jana2006 and restrained using'
 'the AFIX 1 restrain on SHELX-97'  
;
 
_cell_length_a                    9.2424(5) 
_cell_length_b                    12.6314(7) 
_cell_length_c                    14.3871(8) 
_cell_angle_alpha                 67.071(4) 
_cell_angle_beta                  85.695(4) 
_cell_angle_gamma                 88.087(4) 
_cell_volume                      1542.53(15) 
_cell_formula_units_Z             4 
_cell_measurement_temperature     100(2) 
_cell_measurement_reflns_used    24605
_cell_measurement_theta_min      1.54
_cell_measurement_theta_max      29.72
 
_exptl_crystal_description        'Rectangular Plate' 
_exptl_crystal_colour             'Red' 
_exptl_crystal_size_max           0.077 
_exptl_crystal_size_mid           0.072 
_exptl_crystal_size_min           0.038 
_exptl_crystal_density_meas       ? 
_exptl_crystal_density_diffrn     3.214 
_exptl_crystal_density_method     'not measured' 
_exptl_crystal_F_000              1312 
_exptl_absorpt_coefficient_mu     9.641 
_exptl_absorpt_correction_type   integration
_exptl_absorpt_correction_T_min  0.2408
_exptl_absorpt_correction_T_max  0.5070
_exptl_absorpt_process_details    'X-SHAPE' 
 
_exptl_special_details 
; 
 ? 
; 
 
_diffrn_ambient_temperature       100(2) 
_diffrn_measurement_device         '2-circle goniometer'
_diffrn_measurement_device_type    'STOE IPDS 2'
_diffrn_detector                   'image plate (34 cm diameter)'
_diffrn_detector_type              'STOE'
_diffrn_detector_area_resol_mean   6.67
_diffrn_source           'sealed X-ray tube, 12 x 0.4 mm long-fine focus'
_diffrn_source_voltage             40
_diffrn_source_current             30
_diffrn_source_power               1.20
_diffrn_radiation_type             'Mo K\a'
_diffrn_radiation_wavelength       0.71073
_diffrn_radiation_monochromator    'plane graphite'
_diffrn_radiation_polarisn_norm    0
_diffrn_radiation_collimation      '0.5 mm diameter, monocapillary'
_diffrn_measurement_method         'rotation method'
_diffrn_measurement_details
; 360 frames, detector distance = 100 mm
;
 
_diffrn_reflns_number             8306 
_diffrn_reflns_av_R_equivalents   0.0899 
_diffrn_reflns_av_sigmaI/netI     0.0545  
_diffrn_reflns_limit_h_min        -12 
_diffrn_reflns_limit_h_max        12 
_diffrn_reflns_limit_k_min        -17 
_diffrn_reflns_limit_k_max        17 
_diffrn_reflns_limit_l_min        -19 
_diffrn_reflns_limit_l_max        19 
_diffrn_reflns_theta_min          1.54 
_diffrn_reflns_theta_max          29.19 
_reflns_number_total              8306 
_reflns_number_gt                 7406 
_reflns_threshold_expression      >2sigma(I) 
 
_computing_data_collection       'STOE X-AREA'
_computing_cell_refinement       'STOE X-AREA'
_computing_data_reduction        'STOE X-RED'
_computing_structure_solution     'SHELXS-97 (Sheldrick, 2008)' 
_computing_structure_refinement   'SHELXL-97 (Sheldrick, 2008)' 
_computing_molecular_graphics     ? 
_computing_publication_material   ? 
 
_refine_special_details 
; 
 Refinement of F^2^ against ALL reflections.  The weighted R-factor wR and 
 goodness of fit S are based on F^2^, conventional R-factors R are based 
 on F, with F set to zero for negative F^2^. The threshold expression of 
 F^2^ > 2sigma(F^2^) is used only for calculating R-factors(gt) etc. and is 
 not relevant to the choice of reflections for refinement.  R-factors based 
 on F^2^ are statistically about twice as large as those based on F, and R- 
 factors based on ALL data will be even larger. 
; 
 
_refine_ls_structure_factor_coef  Fsqd  
_refine_ls_matrix_type            full 
_refine_ls_weighting_scheme       calc  
_refine_ls_weighting_details 
 'calc w=1/[\s^2^(Fo^2^)+(0.0482P)^2^+303.2563P] where P=(Fo^2^+2Fc^2^)/3' 
_atom_sites_solution_primary      direct 
_atom_sites_solution_secondary    difmap 
_atom_sites_solution_hydrogens    geom 
_refine_ls_hydrogen_treatment     mixed
_refine_ls_extinction_method      SHELXL 
_refine_ls_extinction_coef        0.00068(11) 
_refine_ls_extinction_expression 
 'Fc^*^=kFc[1+0.001xFc^2^\l^3^/sin(2\q)]^-1/4^' 
_refine_ls_number_reflns          8306 
_refine_ls_number_parameters      165 
_refine_ls_number_restraints      0 
_refine_ls_R_factor_all           0.1098 
_refine_ls_R_factor_gt            0.1000 
_refine_ls_wR_factor_ref          0.2671 
_refine_ls_wR_factor_gt           0.2613 
_refine_ls_goodness_of_fit_ref    1.097 
_refine_ls_restrained_S_all       1.097 
_refine_ls_shift/su_max           0.000 
_refine_ls_shift/su_mean          0.000 
 
loop_ 
 _atom_site_label 
 _atom_site_type_symbol 
 _atom_site_fract_x 
 _atom_site_fract_y 
 _atom_site_fract_z 
 _atom_site_U_iso_or_equiv 
 _atom_site_adp_type 
 _atom_site_occupancy 
 _atom_site_symmetry_multiplicity 
 _atom_site_calc_flag 
 _atom_site_refinement_flags 
 _atom_site_disorder_assembly 
 _atom_site_disorder_group 
Sn1 Sn -0.70975(19) 0.33707(15) 0.32161(14) 0.0280(4) Uani 1 1 d . . . 
Sn2 Sn -0.74799(18) 0.83599(14) 0.33099(14) 0.0270(4) Uani 1 1 d . . . 
I1 I 0.01389(18) 0.25616(14) 0.48031(14) 0.0305(4) Uani 1 1 d . . . 
I2 I -0.92298(19) 0.43409(15) 0.16124(14) 0.0329(4) Uani 1 1 d . . . 
I3 I -0.68312(18) 0.55418(14) 0.35506(14) 0.0304(4) Uani 1 1 d . . . 
I4 I -0.44886(18) 0.41188(15) 0.15726(14) 0.0310(4) Uani 1 1 d . . . 
I5 I -0.52562(18) 0.89811(15) 0.15883(14) 0.0311(4) Uani 1 1 d . . . 
I6 I -0.48870(18) 0.19858(15) 0.51137(14) 0.0309(4) Uani 1 1 d . . . 
I7 I -0.78017(19) 1.08211(14) 0.30284(14) 0.0316(4) Uani 1 1 d . . . 
I8 I -1.0075(2) 0.88034(16) 0.18690(15) 0.0356(4) Uani 1 1 d . . . 
C1 C -0.219(3) 0.563(2) 0.365(2) 0.035(3) Uani 1 1 d . . . 
C2 C -0.254(3) 0.098(2) 0.330(2) 0.036(3) Uani 1 1 d . . . 
C3 C -0.783(3) 0.768(2) -0.005(2) 0.036(3) Uani 1 1 d . . . 
C4 C -1.260(3) 0.757(3) 0.018(3) 0.041(3) Uani 1 1 d . . . 
N1 N -0.283(2) 0.469(2) 0.372(2) 0.035(3) Uani 1 1 d . . . 
N2 N -0.291(2) 0.660(2) 0.346(2) 0.035(3) Uani 1 1 d . . . 
N3 N -0.078(2) 0.567(2) 0.364(2) 0.035(3) Uani 1 1 d . . . 
N4 N -1.176(3) 0.196(2) 0.2848(19) 0.036(3) Uani 1 1 d . . . 
N5 N -0.381(3) 0.092(2) 0.3045(19) 0.036(3) Uani 1 1 d . . . 
N6 N -0.190(3) 0.012(2) 0.3969(19) 0.036(3) Uani 1 1 d . . . 
N7 N -0.262(3) 1.125(2) 0.0518(19) 0.036(3) Uani 1 1 d . . . 
N8 N -0.890(3) 0.729(2) -0.0377(19) 0.036(3) Uani 1 1 d . . . 
N9 N -0.710(3) 0.702(2) 0.0721(19) 0.036(3) Uani 1 1 d . . . 
N10 N -1.203(3) 0.861(2) -0.018(2) 0.041(3) Uani 1 1 d . . . 
N11 N -1.223(3) 0.677(2) 0.104(2) 0.041(3) Uani 1 1 d . . . 
N12 N -1.357(3) 0.734(2) -0.034(2) 0.041(3) Uani 1 1 d . . . 
H1A H -0.2311 0.4081 0.3837 0.049 Uiso 1 1 d . . . 
H1B H -0.3728 0.4719 0.3583 0.049 Uiso 1 1 d . . . 
H2A H -0.3832 0.6624 0.3305 0.054 Uiso 1 1 d . . . 
H2B H -0.2554 0.7180 0.3524 0.054 Uiso 1 1 d . . . 
H3A H -0.0265 0.5060 0.3693 0.053 Uiso 1 1 d . . . 
H3B H -0.0344 0.6253 0.3694 0.053 Uiso 1 1 d . . . 
H4A H -1.0982 0.2096 0.3047 0.044 Uiso 1 1 d . . . 
H4B H -1.2111 0.2520 0.2279 0.044 Uiso 1 1 d . . . 
H5A H -0.4375 0.1518 0.2823 0.048 Uiso 1 1 d . . . 
H5B H -0.4134 0.0254 0.3073 0.048 Uiso 1 1 d . . . 
H6A H -0.1053 0.0186 0.4159 0.049 Uiso 1 1 d . . . 
H6B H -0.2328 -0.0559 0.4226 0.049 Uiso 1 1 d . . . 
H7A H -0.1980 1.0690 0.0748 0.055 Uiso 1 1 d . . . 
H7B H -0.3541 1.1073 0.0637 0.055 Uiso 1 1 d . . . 
H8A H -0.9697 0.7687 -0.0515 0.041 Uiso 1 1 d . . . 
H8B H -0.8800 0.6649 -0.0462 0.041 Uiso 1 1 d . . . 
H9A H -0.6520 0.7296 0.1006 0.043 Uiso 1 1 d . . . 
H9B H -0.7272 0.6271 0.0976 0.043 Uiso 1 1 d . . . 
H10A H -1.1148 0.8735 -0.0059 0.044 Uiso 1 1 d . . . 
H10B H -1.2521 0.9209 -0.0578 0.044 Uiso 1 1 d . . . 
H11A H -1.1524 0.6898 0.1361 0.046 Uiso 1 1 d . . . 
H11B H -1.2696 0.6130 0.1301 0.046 Uiso 1 1 d . . . 
H12A H -1.4089 0.7858 -0.0727 0.061 Uiso 1 1 d . . . 
H12B H -1.3737 0.6600 -0.0195 0.061 Uiso 1 1 d . . . 
 
loop_ 
 _atom_site_aniso_label 
 _atom_site_aniso_U_11 
 _atom_site_aniso_U_22 
 _atom_site_aniso_U_33 
 _atom_site_aniso_U_23 
 _atom_site_aniso_U_13 
 _atom_site_aniso_U_12 
Sn1 0.0259(8) 0.0255(8) 0.0359(9) -0.0158(7) 0.0005(7) -0.0040(6) 
Sn2 0.0236(8) 0.0248(8) 0.0351(9) -0.0148(7) 0.0025(6) -0.0045(6) 
I1 0.0282(8) 0.0289(8) 0.0364(9) -0.0156(7) 0.0034(6) -0.0038(6) 
I2 0.0310(8) 0.0279(8) 0.0397(9) -0.0120(7) -0.0052(7) -0.0063(6) 
I3 0.0280(8) 0.0267(8) 0.0411(9) -0.0183(7) 0.0003(6) -0.0042(6) 
I4 0.0295(8) 0.0295(8) 0.0360(9) -0.0152(7) 0.0022(6) -0.0054(6) 
I5 0.0283(8) 0.0309(8) 0.0367(9) -0.0166(7) 0.0038(6) -0.0067(6) 
I6 0.0287(8) 0.0294(8) 0.0370(9) -0.0153(7) -0.0022(6) -0.0035(6) 
I7 0.0302(8) 0.0266(8) 0.0429(10) -0.0190(7) 0.0000(7) -0.0026(6) 
I8 0.0329(9) 0.0342(9) 0.0406(10) -0.0141(7) -0.0054(7) -0.0091(7) 
C1 0.026(6) 0.028(6) 0.052(8) -0.016(5) 0.000(5) -0.002(4) 
C2 0.034(6) 0.032(6) 0.041(7) -0.016(5) 0.011(5) -0.009(5) 
C3 0.042(7) 0.029(6) 0.037(7) -0.010(5) -0.007(5) -0.010(5) 
C4 0.045(7) 0.035(7) 0.051(8) -0.027(6) -0.004(6) -0.004(5) 
N1 0.026(6) 0.028(6) 0.052(8) -0.016(5) 0.000(5) -0.002(4) 
N2 0.026(6) 0.028(6) 0.052(8) -0.016(5) 0.000(5) -0.002(4) 
N3 0.026(6) 0.028(6) 0.052(8) -0.016(5) 0.000(5) -0.002(4) 
N4 0.034(6) 0.032(6) 0.041(7) -0.016(5) 0.011(5) -0.009(5) 
N5 0.034(6) 0.032(6) 0.041(7) -0.016(5) 0.011(5) -0.009(5) 
N6 0.034(6) 0.032(6) 0.041(7) -0.016(5) 0.011(5) -0.009(5) 
N7 0.042(7) 0.029(6) 0.037(7) -0.010(5) -0.007(5) -0.010(5) 
N8 0.042(7) 0.029(6) 0.037(7) -0.010(5) -0.007(5) -0.010(5) 
N9 0.042(7) 0.029(6) 0.037(7) -0.010(5) -0.007(5) -0.010(5) 
N10 0.045(7) 0.035(7) 0.051(8) -0.027(6) -0.004(6) -0.004(5) 
N11 0.045(7) 0.035(7) 0.051(8) -0.027(6) -0.004(6) -0.004(5) 
N12 0.045(7) 0.035(7) 0.051(8) -0.027(6) -0.004(6) -0.004(5) 
 
loop_ 
 _geom_bond_atom_site_label_1 
 _geom_bond_atom_site_label_2 
 _geom_bond_distance 
 _geom_bond_site_symmetry_2 
 _geom_bond_publ_flag 
Sn1 I3 2.984(2) . ? 
Sn1 I2 3.005(3) . ? 
Sn1 I4 3.139(2) . ? 
Sn1 I1 3.203(2) 1_455 ? 
Sn2 I5 2.967(2) . ? 
Sn2 I7 2.982(2) . ? 
Sn2 I6 3.167(3) 2_466 ? 
Sn2 I8 3.181(3) . ? 
I1 Sn1 3.203(2) 1_655 ? 
I6 Sn2 3.167(3) 2_466 ? 
C1 N2 1.31(3) . ? 
C1 N1 1.31(3) . ? 
C1 N3 1.31(3) . ? 
C2 N5 1.27(4) . ? 
C2 N6 1.29(4) . ? 
C2 N4 1.36(3) 1_655 ? 
C3 N8 1.31(3) . ? 
C3 N9 1.32(4) . ? 
C3 N7 1.32(3) 2_475 ? 
C4 N12 1.31(4) . ? 
C4 N10 1.32(4) . ? 
C4 N11 1.33(4) . ? 
N4 C2 1.36(3) 1_455 ? 
N7 C3 1.32(3) 2_475 ? 
 
loop_ 
 _geom_angle_atom_site_label_1 
 _geom_angle_atom_site_label_2 
 _geom_angle_atom_site_label_3 
 _geom_angle 
 _geom_angle_site_symmetry_1 
 _geom_angle_site_symmetry_3 
 _geom_angle_publ_flag 
I3 Sn1 I2 94.82(7) . . ? 
I3 Sn1 I4 90.19(6) . . ? 
I2 Sn1 I4 90.90(7) . . ? 
I3 Sn1 I1 92.26(7) . 1_455 ? 
I2 Sn1 I1 86.49(7) . 1_455 ? 
I4 Sn1 I1 176.56(8) . 1_455 ? 
I5 Sn2 I7 90.61(7) . . ? 
I5 Sn2 I6 92.31(6) . 2_466 ? 
I7 Sn2 I6 89.98(6) . 2_466 ? 
I5 Sn2 I8 92.60(7) . . ? 
I7 Sn2 I8 86.62(7) . . ? 
I6 Sn2 I8 174.06(8) 2_466 . ? 
N2 C1 N1 122(3) . . ? 
N2 C1 N3 118(2) . . ? 
N1 C1 N3 120(3) . . ? 
N5 C2 N6 123(3) . . ? 
N5 C2 N4 120(3) . 1_655 ? 
N6 C2 N4 117(3) . 1_655 ? 
N8 C3 N9 123(3) . . ? 
N8 C3 N7 121(3) . 2_475 ? 
N9 C3 N7 116(3) . 2_475 ? 
N12 C4 N10 119(3) . . ? 
N12 C4 N11 119(3) . . ? 
N10 C4 N11 122(3) . . ? 
 
_diffrn_measured_fraction_theta_max    0.993 
_diffrn_reflns_theta_full              29.19 
_diffrn_measured_fraction_theta_full   0.993 
_refine_diff_density_max    3.770 
_refine_diff_density_min   -3.037 
_refine_diff_density_rms    0.564
#=======================================================================
data_3b.GA2SnI4-293K
#======================================================================= 

 
_audit_creation_method            SHELXL-97 
_chemical_name_systematic 
; 
 ? 
; 
_chemical_name_common             'DiGuanidinium Tin Iodide'
_chemical_melting_point           ? 
_chemical_formula_moiety          '(C(NH2)3)2SnI4'
_chemical_formula_sum 
 'C2 H12 I4 N6 Sn' 
_chemical_formula_weight          746.47 
 
loop_ 
 _atom_type_symbol 
 _atom_type_description 
 _atom_type_scat_dispersion_real 
 _atom_type_scat_dispersion_imag 
 _atom_type_scat_source 
 'C'  'C'   0.0033   0.0016 
 'International Tables Vol C Tables 4.2.6.8 and 6.1.1.4' 
 'H'  'H'   0.0000   0.0000 
 'International Tables Vol C Tables 4.2.6.8 and 6.1.1.4' 
 'N'  'N'   0.0061   0.0033 
 'International Tables Vol C Tables 4.2.6.8 and 6.1.1.4' 
 'Sn'  'Sn'  -0.6537   1.4246 
 'International Tables Vol C Tables 4.2.6.8 and 6.1.1.4' 
 'I'  'I'  -0.4742   1.8119 
 'International Tables Vol C Tables 4.2.6.8 and 6.1.1.4' 
 
_symmetry_cell_setting           monoclinic
_symmetry_space_group_name_H-M   'P 21/n'
_symmetry_space_group_name_Hall  '-P 2yn'
_symmetry_Int_Tables_number      14
 
loop_ 
 _symmetry_equiv_pos_as_xyz 
 'x, y, z' 
 '-x+1/2, y+1/2, -z+1/2' 
 '-x, -y, -z' 
 'x-1/2, -y-1/2, z-1/2' 
 
_cell_length_a                    9.2941(4) 
_cell_length_b                    26.9386(12) 
_cell_length_c                    12.8895(6) 
_cell_angle_alpha                 90.00 
_cell_angle_beta                  90.114(4) 
_cell_angle_gamma                 90.00 
_cell_volume                      3227.1(3) 
_cell_formula_units_Z             8 
_cell_measurement_temperature     293(2) 
_cell_measurement_reflns_used    20579
_cell_measurement_theta_min      1.58
_cell_measurement_theta_max      28.84
 
_exptl_crystal_description        'rectangular plate' 
_exptl_crystal_colour             'red' 
_exptl_crystal_size_max           0.036 
_exptl_crystal_size_mid           0.026 
_exptl_crystal_size_min           0.007 
_exptl_crystal_density_meas       ? 
_exptl_crystal_density_diffrn     3.073 
_exptl_crystal_density_method     'not measured' 
_exptl_crystal_F_000              2624 
_exptl_absorpt_coefficient_mu     9.216 
_exptl_absorpt_correction_type   integration
_exptl_absorpt_correction_T_min  0.1494
_exptl_absorpt_correction_T_max  0.8719
_exptl_absorpt_process_details    'X-SHAPE' 
 
_exptl_special_details 
; 
 ? 
; 
 
_diffrn_ambient_temperature       293(2) 
_diffrn_measurement_device         '2-circle goniometer'
_diffrn_measurement_device_type    'STOE IPDS 2'
_diffrn_detector                   'image plate (34 cm diameter)'
_diffrn_detector_type              'STOE'
_diffrn_detector_area_resol_mean   6.67
_diffrn_source           'sealed X-ray tube, 12 x 0.4 mm long-fine focus'
_diffrn_source_voltage             40
_diffrn_source_current             30
_diffrn_source_power               1.20
_diffrn_radiation_type             'Mo K\a'
_diffrn_radiation_wavelength       0.71073
_diffrn_radiation_monochromator    'plane graphite'
_diffrn_radiation_polarisn_norm    0
_diffrn_radiation_collimation      '0.5 mm diameter, monocapillary'
_diffrn_measurement_method         'rotation method'
_diffrn_measurement_details
; 180 frames, detector distance = 100 mm
;
 
_diffrn_reflns_number             30779 
_diffrn_reflns_av_R_equivalents   0.0778 
_diffrn_reflns_av_sigmaI/netI     0.0585 
_diffrn_reflns_limit_h_min        -12 
_diffrn_reflns_limit_h_max        12 
_diffrn_reflns_limit_k_min        -36 
_diffrn_reflns_limit_k_max        36 
_diffrn_reflns_limit_l_min        -17 
_diffrn_reflns_limit_l_max        17 
_diffrn_reflns_theta_min          1.75 
_diffrn_reflns_theta_max          29.26 
_reflns_number_total              8650 
_reflns_number_gt                 6638 
_reflns_threshold_expression      >2sigma(I) 
 
_computing_data_collection       'STOE X-AREA'
_computing_cell_refinement       'STOE X-AREA'
_computing_data_reduction        'STOE X-RED'
_computing_structure_solution     'SHELXS-97 (Sheldrick, 2008)' 
_computing_structure_refinement   'SHELXL-97 (Sheldrick, 2008)' 
_computing_molecular_graphics     ? 
_computing_publication_material   ? 
 
_refine_special_details 
; 
 Refinement of F^2^ against ALL reflections.  The weighted R-factor wR and 
 goodness of fit S are based on F^2^, conventional R-factors R are based 
 on F, with F set to zero for negative F^2^. The threshold expression of 
 F^2^ > 2sigma(F^2^) is used only for calculating R-factors(gt) etc. and is 
 not relevant to the choice of reflections for refinement.  R-factors based 
 on F^2^ are statistically about twice as large as those based on F, and R- 
 factors based on ALL data will be even larger. 
; 
 
_refine_ls_structure_factor_coef  Fsqd  
_refine_ls_matrix_type            full 
_refine_ls_weighting_scheme       calc  
_refine_ls_weighting_details 
 'calc w=1/[\s^2^(Fo^2^)+(0.0534P)^2^+28.5891P] where P=(Fo^2^+2Fc^2^)/3' 
_atom_sites_solution_primary      direct 
_atom_sites_solution_secondary    difmap 
_atom_sites_solution_hydrogens    geom 
_refine_ls_hydrogen_treatment     mixed 
_refine_ls_extinction_method      none 
_refine_ls_extinction_coef        ? 
_refine_ls_number_reflns          8650 
_refine_ls_number_parameters      183 
_refine_ls_number_restraints      0 
_refine_ls_R_factor_all           0.0979 
_refine_ls_R_factor_gt            0.0727 
_refine_ls_wR_factor_ref          0.1717 
_refine_ls_wR_factor_gt           0.1539 
_refine_ls_goodness_of_fit_ref    1.097 
_refine_ls_restrained_S_all       1.097 
_refine_ls_shift/su_max           0.000 
_refine_ls_shift/su_mean          0.000 
 
loop_ 
 _atom_site_label 
 _atom_site_type_symbol 
 _atom_site_fract_x 
 _atom_site_fract_y 
 _atom_site_fract_z 
 _atom_site_U_iso_or_equiv 
 _atom_site_adp_type 
 _atom_site_occupancy 
 _atom_site_symmetry_multiplicity 
 _atom_site_calc_flag 
 _atom_site_refinement_flags 
 _atom_site_disorder_assembly 
 _atom_site_disorder_group 
Sn1 Sn 0.25188(10) 0.08631(3) 0.75636(8) 0.0488(3) Uani 1 1 d . . . 
Sn2 Sn 0.24113(10) 0.08833(3) 1.25463(8) 0.0484(3) Uani 1 1 d . . . 
I1 I 0.30125(11) 0.10092(4) 0.99342(11) 0.0658(3) Uani 1 1 d . . . 
I2 I 0.50080(16) 0.16100(4) 0.71504(12) 0.0761(4) Uani 1 1 d . . . 
I3 I 0.00368(16) 0.00259(5) 0.78792(8) 0.0593(2) Uani 1 1 d . . . 
I4 I 0.02264(16) 0.16675(4) 0.75964(12) 0.0675(3) Uani 1 1 d . . . 
I5 I 0.19283(12) 0.07810(4) 0.49175(12) 0.0688(3) Uani 1 1 d . . . 
I6 I 0.50398(16) -0.00300(4) 0.75309(8) 0.0569(2) Uani 1 1 d . . . 
I7 I 0.47159(16) 0.16526(4) 1.29204(12) 0.0675(4) Uani 1 1 d . . . 
I8 I 0.00637(16) 0.16792(4) 1.23507(12) 0.0696(4) Uani 1 1 d . . . 
C1 C 0.2710(18) -0.0660(7) 0.4984(18) 0.079(2) Uani 1 1 d . . . 
C2 C 0.231(2) -0.0801(10) 0.989(3) 0.119(4) Uani 1 1 d . . . 
C3 C 0.792(4) 0.2330(9) 1.493(3) 0.145(5) Uani 1 1 d . . . 
C4 C -0.297(3) 0.2377(10) 1.001(3) 0.112(9) Uani 1 1 d . . . 
N1 N 0.2078(18) -0.0651(6) 0.5868(11) 0.079(2) Uani 1 1 d . . . 
H1A H 0.2578 -0.0641 0.6429 0.095 Uiso 1 1 calc R . . 
H1B H 0.1153 -0.0654 0.5898 0.095 Uiso 1 1 calc R . . 
N2 N 0.4105(14) -0.0653(5) 0.5025(14) 0.079(2) Uani 1 1 d . . . 
H2A H 0.4536 -0.0644 0.5615 0.095 Uiso 1 1 calc R . . 
H2B H 0.4599 -0.0659 0.4461 0.095 Uiso 1 1 calc R . . 
N3 N 0.1970(17) -0.0700(6) 0.4131(11) 0.079(2) Uani 1 1 d . . . 
H3A H 0.1048 -0.0721 0.4155 0.095 Uiso 1 1 calc R . . 
H3B H 0.2404 -0.0706 0.3542 0.095 Uiso 1 1 calc R . . 
N4 N 0.0988(17) -0.0922(7) 1.003(2) 0.119(4) Uani 1 1 d . . . 
H4A H 0.0501 -0.0785 1.0522 0.142 Uiso 1 1 calc R . . 
H4B H 0.0591 -0.1139 0.9636 0.142 Uiso 1 1 calc R . . 
N5 N 0.292(2) -0.1013(8) 0.8955(17) 0.119(4) Uani 1 1 d . . . 
H5A H 0.3773 -0.0931 0.8762 0.142 Uiso 1 1 calc R . . 
H5B H 0.2427 -0.1221 0.8593 0.142 Uiso 1 1 calc R . . 
N6 N 0.3140(19) -0.0513(8) 1.0319(16) 0.119(4) Uani 1 1 d . . . 
H6A H 0.2853 -0.0338 1.0837 0.142 Uiso 1 1 calc R . . 
H6B H 0.4010 -0.0486 1.0101 0.142 Uiso 1 1 calc R . . 
N7 N 0.808(3) 0.2562(7) 1.3980(18) 0.145(5) Uani 1 1 d . . . 
H7A H 0.7790 0.2863 1.3898 0.174 Uiso 1 1 calc R . . 
H7B H 0.8472 0.2406 1.3472 0.174 Uiso 1 1 calc R . . 
N8 N 0.825(3) 0.1888(6) 1.4987(18) 0.145(5) Uani 1 1 d . . . 
H8A H 0.8087 0.1724 1.5548 0.174 Uiso 1 1 calc R . . 
H8B H 0.8633 0.1743 1.4463 0.174 Uiso 1 1 calc R . . 
N9 N 0.739(3) 0.2533(7) 1.5650(18) 0.145(5) Uani 1 1 d . . . 
H9A H 0.7224 0.2372 1.6213 0.174 Uiso 1 1 calc R . . 
H9B H 0.7160 0.2842 1.5607 0.174 Uiso 1 1 calc R . . 
N10 N -0.371(5) 0.2146(16) 1.050(4) 0.36(4) Uani 1 1 d . . . 
H10A H -0.4097 0.1882 1.0249 0.437 Uiso 1 1 calc R . . 
H10B H -0.3885 0.2232 1.1131 0.437 Uiso 1 1 calc R . . 
N11 N -0.268(4) 0.2291(15) 0.917(3) 0.28(3) Uani 1 1 d . . . 
H11A H -0.3027 0.2033 0.8874 0.335 Uiso 1 1 calc R . . 
H11B H -0.2102 0.2484 0.8842 0.335 Uiso 1 1 calc R . . 
N12 N -0.237(5) 0.2727(15) 1.044(3) 0.33(3) Uani 1 1 d . . . 
H12A H -0.2527 0.2785 1.1087 0.395 Uiso 1 1 calc R . . 
H12B H -0.1795 0.2915 1.0097 0.395 Uiso 1 1 calc R . . 
 
loop_ 
 _atom_site_aniso_label 
 _atom_site_aniso_U_11 
 _atom_site_aniso_U_22 
 _atom_site_aniso_U_33 
 _atom_site_aniso_U_23 
 _atom_site_aniso_U_13 
 _atom_site_aniso_U_12 
Sn1 0.0405(6) 0.0462(6) 0.0597(6) -0.0015(5) 0.0055(6) 0.0002(4) 
Sn2 0.0416(6) 0.0441(6) 0.0596(6) -0.0010(5) 0.0040(6) 0.0001(4) 
I1 0.0531(5) 0.0760(6) 0.0682(6) -0.0002(7) 0.0001(6) 0.0048(5) 
I2 0.0704(8) 0.0654(8) 0.0925(10) -0.0135(6) 0.0268(8) -0.0225(6) 
I3 0.0524(5) 0.0541(5) 0.0714(6) -0.0025(5) 0.0052(7) -0.0041(4) 
I4 0.0601(7) 0.0613(6) 0.0812(8) 0.0007(6) -0.0017(7) 0.0175(5) 
I5 0.0452(5) 0.0909(7) 0.0704(7) -0.0014(7) 0.0054(6) -0.0057(5) 
I6 0.0499(5) 0.0527(4) 0.0682(6) -0.0007(6) 0.0023(6) 0.0053(4) 
I7 0.0589(7) 0.0588(7) 0.0847(9) -0.0076(5) 0.0110(6) -0.0183(5) 
I8 0.0637(8) 0.0572(6) 0.0879(9) -0.0072(6) 0.0037(7) 0.0138(5) 
C1 0.054(4) 0.115(6) 0.068(4) 0.011(6) 0.012(4) -0.015(4) 
C2 0.058(5) 0.133(8) 0.164(10) -0.056(8) 0.017(7) -0.015(6) 
C3 0.239(15) 0.072(6) 0.123(9) 0.013(7) 0.068(11) 0.008(8) 
C4 0.074(13) 0.109(17) 0.15(2) -0.04(2) 0.032(19) 0.000(13) 
N1 0.054(4) 0.115(6) 0.068(4) 0.011(6) 0.012(4) -0.015(4) 
N2 0.054(4) 0.115(6) 0.068(4) 0.011(6) 0.012(4) -0.015(4) 
N3 0.054(4) 0.115(6) 0.068(4) 0.011(6) 0.012(4) -0.015(4) 
N4 0.058(5) 0.133(8) 0.164(10) -0.056(8) 0.017(7) -0.015(6) 
N5 0.058(5) 0.133(8) 0.164(10) -0.056(8) 0.017(7) -0.015(6) 
N6 0.058(5) 0.133(8) 0.164(10) -0.056(8) 0.017(7) -0.015(6) 
N7 0.239(15) 0.072(6) 0.123(9) 0.013(7) 0.068(11) 0.008(8) 
N8 0.239(15) 0.072(6) 0.123(9) 0.013(7) 0.068(11) 0.008(8) 
N9 0.239(15) 0.072(6) 0.123(9) 0.013(7) 0.068(11) 0.008(8) 
N10 0.34(6) 0.28(5) 0.47(8) 0.29(5) 0.25(6) 0.10(4) 
N11 0.28(5) 0.22(4) 0.34(6) -0.03(4) 0.22(5) -0.04(3) 
N12 0.35(7) 0.29(5) 0.34(6) -0.23(5) -0.13(5) -0.06(4) 
 
_geom_special_details 
; 
 All esds (except the esd in the dihedral angle between two l.s. planes) 
 are estimated using the full covariance matrix.  The cell esds are taken 
 into account individually in the estimation of esds in distances, angles 
 and torsion angles; correlations between esds in cell parameters are only 
 used when they are defined by crystal symmetry.  An approximate (isotropic) 
 treatment of cell esds is used for estimating esds involving l.s. planes.
 All the GA cations were refined anisotropically; the refinement is reasonable
 for three of the four cations, except the one residing between the (SnI4)2-
 layers which is severely disordered. For consistency, the C4-N10-N11-N12 GA
 cation is still refined anisotropically even though the thermal parameters
 are irregular, due to the toroidal motion of the cations.
;
 
loop_
 _geom_bond_atom_site_label_1 
 _geom_bond_atom_site_label_2 
 _geom_bond_distance 
 _geom_bond_site_symmetry_2 
 _geom_bond_publ_flag 
Sn1 I4 3.0393(15) . ? 
Sn1 I2 3.1128(16) . ? 
Sn1 I1 3.1138(17) . ? 
Sn2 I7 3.0184(15) . ? 
Sn2 I8 3.0689(16) . ? 
Sn2 I5 3.1022(17) 1_556 ? 
I5 Sn2 3.1023(17) 1_554 ? 
C1 N1 1.28(2) . ? 
C1 N2 1.30(2) . ? 
C1 N3 1.30(3) . ? 
C2 N6 1.22(3) . ? 
C2 N4 1.29(2) . ? 
C2 N5 1.45(3) . ? 
C3 N9 1.18(3) . ? 
C3 N8 1.23(3) . ? 
C3 N7 1.39(3) . ? 
C4 N10 1.12(4) . ? 
C4 N11 1.14(5) . ? 
C4 N12 1.23(4) . ? 
 
loop_ 
 _geom_angle_atom_site_label_1 
 _geom_angle_atom_site_label_2 
 _geom_angle_atom_site_label_3 
 _geom_angle 
 _geom_angle_site_symmetry_1 
 _geom_angle_site_symmetry_3 
 _geom_angle_publ_flag 
I4 Sn1 I2 93.60(5) . . ? 
I4 Sn1 I1 89.90(4) . . ? 
I2 Sn1 I1 88.75(4) . . ? 
I7 Sn2 I8 92.16(5) . . ? 
I7 Sn2 I5 90.44(4) . 1_556 ? 
I8 Sn2 I5 92.22(4) . 1_556 ? 
N1 C1 N2 115(2) . . ? 
N1 C1 N3 120.7(16) . . ? 
N2 C1 N3 124(2) . . ? 
N6 C2 N4 134(3) . . ? 
N6 C2 N5 112(2) . . ? 
N4 C2 N5 113(2) . . ? 
N9 C3 N8 121(3) . . ? 
N9 C3 N7 122(2) . . ? 
N8 C3 N7 117(3) . . ? 
N10 C4 N11 125(5) . . ? 
N10 C4 N12 117(5) . . ? 
N11 C4 N12 118(4) . . ? 
 
_diffrn_measured_fraction_theta_max    0.986 
_diffrn_reflns_theta_full              29.26 
_diffrn_measured_fraction_theta_full   0.986 
_refine_diff_density_max    1.712 
_refine_diff_density_min   -1.408 
_refine_diff_density_rms    0.207 

#=======================================================================
data_3b.GA2SnI4-400K
#======================================================================= 
 
 
_audit_creation_method            SHELXL-97 
_chemical_name_systematic 
; 
 ? 
; 
_chemical_name_common             'Diguanidinium Tin Iodide' 
_chemical_melting_point           ? 
_chemical_formula_moiety          '(C(NH2)3)2SnI4' 
_chemical_formula_sum 
 'C2 H12 I4 N6 Sn' 
_chemical_formula_weight          746.47 
 
loop_ 
 _atom_type_symbol 
 _atom_type_description 
 _atom_type_scat_dispersion_real 
 _atom_type_scat_dispersion_imag 
 _atom_type_scat_source 
 'C'  'C'   0.0033   0.0016 
 'International Tables Vol C Tables 4.2.6.8 and 6.1.1.4' 
 'H'  'H'   0.0000   0.0000 
 'International Tables Vol C Tables 4.2.6.8 and 6.1.1.4' 
 'N'  'N'   0.0061   0.0033 
 'International Tables Vol C Tables 4.2.6.8 and 6.1.1.4' 
 'Sn'  'Sn'  -0.6537   1.4246 
 'International Tables Vol C Tables 4.2.6.8 and 6.1.1.4' 
 'I'  'I'  -0.4742   1.8119 
 'International Tables Vol C Tables 4.2.6.8 and 6.1.1.4' 
 
_symmetry_cell_setting            Orthorhombic 
_symmetry_space_group_name_H-M    Pmna
_symmetry_space_group_name_Hall  '-P 2ac 2'
_symmetry_Int_Tables_number      53 
 
loop_ 
 _symmetry_equiv_pos_as_xyz 
 'x, y, z' 
 '-x+1/2, -y, z+1/2' 
 '-x+1/2, y, -z+1/2' 
 'x, -y, -z' 
 '-x, -y, -z' 
 'x-1/2, y, -z-1/2' 
 'x-1/2, -y, z-1/2' 
 '-x, y, z' 
 
_cell_length_a                    13.0471(10) 
_cell_length_b                    13.5581(15) 
_cell_length_c                    9.3478(12) 
_cell_angle_alpha                 90.00 
_cell_angle_beta                  90.00 
_cell_angle_gamma                 90.00 
_cell_volume                      1653.6(3) 
_cell_formula_units_Z             4 
_cell_measurement_temperature     400(2) 
_cell_measurement_reflns_used    2604
_cell_measurement_theta_min      2.65
_cell_measurement_theta_max      25.63
 
_exptl_crystal_description        'rectangular plate' 
_exptl_crystal_colour             'red' 
_exptl_crystal_size_max           0.039 
_exptl_crystal_size_mid           0.024 
_exptl_crystal_size_min           0.019 
_exptl_crystal_density_meas       ?
_exptl_crystal_density_diffrn     2.998 
_exptl_crystal_density_method     'not measured' 
_exptl_crystal_F_000              1312 
_exptl_absorpt_coefficient_mu     8.993 
_exptl_absorpt_correction_type   integration
_exptl_absorpt_correction_T_min  0.5768
_exptl_absorpt_correction_T_max  0.7668
_exptl_absorpt_process_details    'X-SHAPE' 
 
_exptl_special_details 
; 
 ? 
; 
 
_diffrn_ambient_temperature       400(2) 
_diffrn_measurement_device         '2-circle goniometer'
_diffrn_measurement_device_type    'STOE IPDS 2'
_diffrn_detector                   'image plate (34 cm diameter)'
_diffrn_detector_type              'STOE'
_diffrn_detector_area_resol_mean   6.67
_diffrn_source           'sealed X-ray tube, 12 x 0.4 mm long-fine focus'
_diffrn_source_voltage             40
_diffrn_source_current             30
_diffrn_source_power               1.20
_diffrn_radiation_type             'Mo K\a'
_diffrn_radiation_wavelength       0.71073
_diffrn_radiation_monochromator    'plane graphite'
_diffrn_radiation_polarisn_norm    0
_diffrn_radiation_collimation      '0.5 mm diameter, monocapillary'
_diffrn_measurement_method         'rotation method'
_diffrn_measurement_details
; 74 frames, detector distance = 100 mm
;

_diffrn_reflns_number             6090 
_diffrn_reflns_av_R_equivalents   0.0439 
_diffrn_reflns_av_sigmaI/netI     0.0547 
_diffrn_reflns_limit_h_min        -17 
_diffrn_reflns_limit_h_max        15 
_diffrn_reflns_limit_k_min        -18 
_diffrn_reflns_limit_k_max        15 
_diffrn_reflns_limit_l_min        -12 
_diffrn_reflns_limit_l_max        8 
_diffrn_reflns_theta_min          2.65 
_diffrn_reflns_theta_max          29.18 
_reflns_number_total              2315 
_reflns_number_gt                 985 
_reflns_threshold_expression      >2sigma(I) 
 
_computing_data_collection       'STOE X-AREA'
_computing_cell_refinement       'STOE X-AREA'
_computing_data_reduction        'STOE X-RED' 
_computing_structure_solution     'SHELXS-97 (Sheldrick, 2008)' 
_computing_structure_refinement   'SHELXL-97 (Sheldrick, 2008)' 
_computing_molecular_graphics     ? 
_computing_publication_material   ? 
 
_refine_special_details 
; 
 Refinement of F^2^ against ALL reflections.  The weighted R-factor wR and 
 goodness of fit S are based on F^2^, conventional R-factors R are based 
 on F, with F set to zero for negative F^2^. The threshold expression of 
 F^2^ > 2sigma(F^2^) is used only for calculating R-factors(gt) etc. and is 
 not relevant to the choice of reflections for refinement.  R-factors based 
 on F^2^ are statistically about twice as large as those based on F, and R- 
 factors based on ALL data will be even larger. 
; 
 
_refine_ls_structure_factor_coef  Fsqd  
_refine_ls_matrix_type            full 
_refine_ls_weighting_scheme       calc  
_refine_ls_weighting_details 
 'calc w=1/[\s^2^(Fo^2^)+(0.0691P)^2^+0.0000P] where P=(Fo^2^+2Fc^2^)/3' 
_atom_sites_solution_primary      direct 
_atom_sites_solution_secondary    difmap 
_atom_sites_solution_hydrogens    geom 
_refine_ls_hydrogen_treatment     mixed 
_refine_ls_extinction_method      none 
_refine_ls_extinction_coef        ? 
_refine_ls_number_reflns          2315 
_refine_ls_number_parameters      48 
_refine_ls_number_restraints      2 
_refine_ls_R_factor_all           0.1414 
_refine_ls_R_factor_gt            0.0509 
_refine_ls_wR_factor_ref          0.1491 
_refine_ls_wR_factor_gt           0.1238 
_refine_ls_goodness_of_fit_ref    0.928 
_refine_ls_restrained_S_all       0.928 
_refine_ls_shift/su_max           0.000 
_refine_ls_shift/su_mean          0.000 
 
loop_ 
 _atom_site_label 
 _atom_site_type_symbol 
 _atom_site_fract_x 
 _atom_site_fract_y 
 _atom_site_fract_z 
 _atom_site_U_iso_or_equiv 
 _atom_site_adp_type 
 _atom_site_occupancy 
 _atom_site_symmetry_multiplicity 
 _atom_site_calc_flag 
 _atom_site_refinement_flags 
 _atom_site_disorder_assembly 
 _atom_site_disorder_group 
Sn Sn 0.2500 0.17433(6) 0.2500 0.0608(3) Uani 1 2 d S . . 
I1 I 0.22832(7) 0.32988(5) 0.48659(10) 0.0943(3) Uani 1 1 d . . . 
I2 I 0.5000 0.17955(11) 0.29566(15) 0.1129(5) Uani 1 2 d S . . 
I3 I 0.23630(10) 0.0000 0.5000 0.0833(4) Uani 1 2 d S . . 
C1 C 0.5000 -0.5342(16) 0.691(3) 0.278(9) Uani 1 2 d SD . . 
C2 C 0.5000 -0.1457(8) 0.242(4) 0.189(5) Uani 1 2 d SD . . 
N1 N 0.5000 -0.609(2) 0.708(3) 0.278(9) Uani 1 2 d SD . . 
H1A H 0.5537 -0.6374 0.7419 0.333 Uiso 0.50 1 calc PR . . 
H1B H 0.4463 -0.6432 0.6884 0.333 Uiso 0.50 1 calc PR . . 
N2 N 0.4140(14) -0.4970(16) 0.727(3) 0.278(9) Uani 1 1 d . . . 
H2A H 0.3661 -0.5343 0.7595 0.333 Uiso 1 1 calc R . . 
H2B H 0.4037 -0.4347 0.7176 0.333 Uiso 1 1 calc R . . 
N3 N 0.5000 -0.1503(16) 0.097(3) 0.189(5) Uani 1 2 d SD . . 
H3A H 0.5571 -0.1517 0.0508 0.226 Uiso 0.50 1 calc PR . . 
H3B H 0.4429 -0.1517 0.0508 0.226 Uiso 0.50 1 calc PR . . 
N4 N 0.5864(12) 0.1441(11) 0.7062(18) 0.189(5) Uani 1 1 d . . . 
H4A H 0.6009 0.1029 0.6391 0.226 Uiso 1 1 calc R . . 
H4B H 0.6326 0.1840 0.7371 0.226 Uiso 1 1 calc R . . 
 
loop_ 
 _atom_site_aniso_label 
 _atom_site_aniso_U_11 
 _atom_site_aniso_U_22 
 _atom_site_aniso_U_33 
 _atom_site_aniso_U_23 
 _atom_site_aniso_U_13 
 _atom_site_aniso_U_12 
Sn 0.0640(5) 0.0606(5) 0.0578(5) 0.000 0.0023(4) 0.000 
I1 0.1079(7) 0.0831(5) 0.0918(6) -0.0241(4) 0.0011(4) -0.0025(5) 
I2 0.0938(8) 0.1650(12) 0.0800(8) 0.0080(8) 0.000 0.000 
I3 0.0981(8) 0.0744(6) 0.0773(7) 0.0080(5) 0.000 0.000 
C1 0.153(12) 0.219(16) 0.46(3) 0.104(17) 0.000 0.000 
C2 0.115(8) 0.314(14) 0.136(10) 0.044(10) 0.000 0.000 
N1 0.153(12) 0.219(16) 0.46(3) 0.104(17) 0.000 0.000 
N2 0.153(12) 0.219(16) 0.46(3) 0.104(17) 0.000 0.000 
N3 0.115(8) 0.314(14) 0.136(10) 0.044(10) 0.000 0.000 
N4 0.115(8) 0.314(14) 0.136(10) 0.044(10) 0.000 0.000 
 
_geom_special_details 
; 
 All esds (except the esd in the dihedral angle between two l.s. planes) 
 are estimated using the full covariance matrix.  The cell esds are taken 
 into account individually in the estimation of esds in distances, angles 
 and torsion angles; correlations between esds in cell parameters are only 
 used when they are defined by crystal symmetry.  An approximate (isotropic) 
 treatment of cell esds is used for estimating esds involving l.s. planes.
;
 
loop_ 
 _geom_bond_atom_site_label_1 
 _geom_bond_atom_site_label_2 
 _geom_bond_distance 
 _geom_bond_site_symmetry_2 
 _geom_bond_publ_flag 
Sn I1 3.0689(10) 3 ? 
Sn I1 3.0690(10) . ? 
C1 N1 1.03(3) . ? 
C1 N2 1.27(2) 8_655 ? 
C1 N2 1.27(2) . ? 
C2 N4 1.227(19) 4_556 ? 
C2 N4 1.227(19) 5_656 ? 
C2 N3 1.36(3) . ? 
N1 N2 1.90(3) 8_655 ? 
N1 N2 1.90(3) . ? 
N4 C2 1.227(19) 5_656 ? 
 
loop_ 
 _geom_angle_atom_site_label_1 
 _geom_angle_atom_site_label_2 
 _geom_angle_atom_site_label_3 
 _geom_angle 
 _geom_angle_site_symmetry_1 
 _geom_angle_site_symmetry_3 
 _geom_angle_publ_flag 
I1 Sn I1 93.19(4) 3 . ? 
N1 C1 N2 110.5(14) . 8_655 ? 
N1 C1 N2 110.5(14) . . ? 
N2 C1 N2 124(3) 8_655 . ? 
N4 C2 N4 134(4) 4_556 5_656 ? 
N4 C2 N3 113.1(18) 4_556 . ? 
N4 C2 N3 113.1(18) 5_656 . ? 
C1 N1 N2 39.0(8) . 8_655 ? 
C1 N1 N2 39.0(8) . . ? 
N2 N1 N2 72.6(16) 8_655 . ? 
C1 N2 N1 30.5(12) . . ? 
 
_diffrn_measured_fraction_theta_max    0.989 
_diffrn_reflns_theta_full              29.18 
_diffrn_measured_fraction_theta_full   0.989 
_refine_diff_density_max    1.453 
_refine_diff_density_min   -0.874 
_refine_diff_density_rms    0.172 
